# Supplementary material for: Structural diversity in the first metal complexes of 2,5-dicarboxamidopyrroles and 2,5-dicarbothioamidopyrroles
Source: Royal Society of Chemistry journal article supplement (doi:10.1039/b802506a), 2008-01-01
Supplement: b802506a.pdf [file b802506a.pdf]

## Structural diversity in the first metal complexes of 2,5-dicarboxamidopyrroles and 2,5-dicarbothioamidopyrroles

Gareth W. Bates,<sup>a</sup> Philip A. Gale,<sup>\*a</sup> Mark E. Light<sup>a</sup>, Mark I. Ogden<sup>\*b</sup> and Colin N. Warriner.<sup>a</sup>

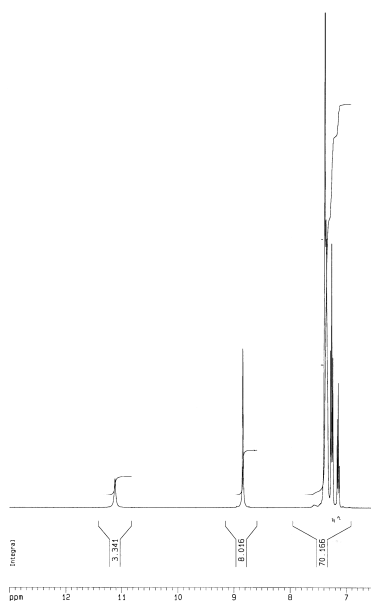

Figure 1 <sup>1</sup>H NMR Spectra of **3** in CDCl<sub>3</sub>

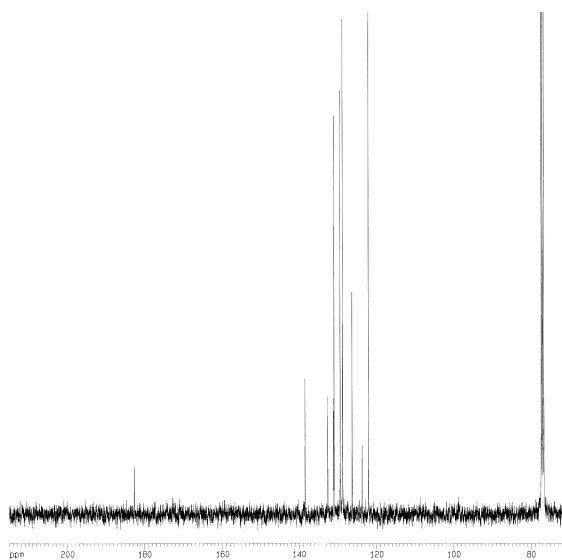

Figure 2 <sup>13</sup>C NMR Spectra of **3** in CDCl<sub>3</sub>

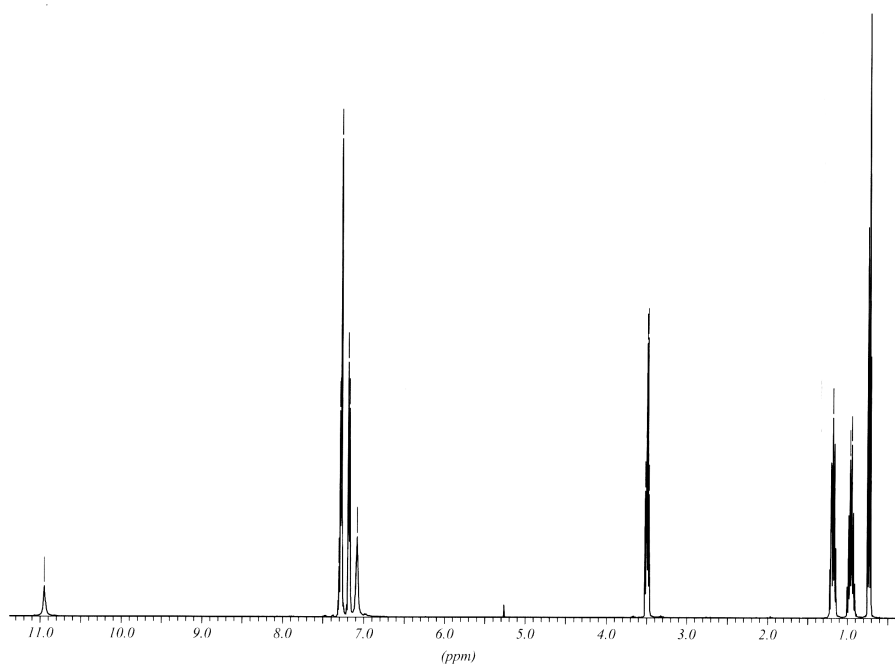

Figure 3  $^1\text{H}$  NMR Spectra of **4** in  $\text{CDCl}_3$

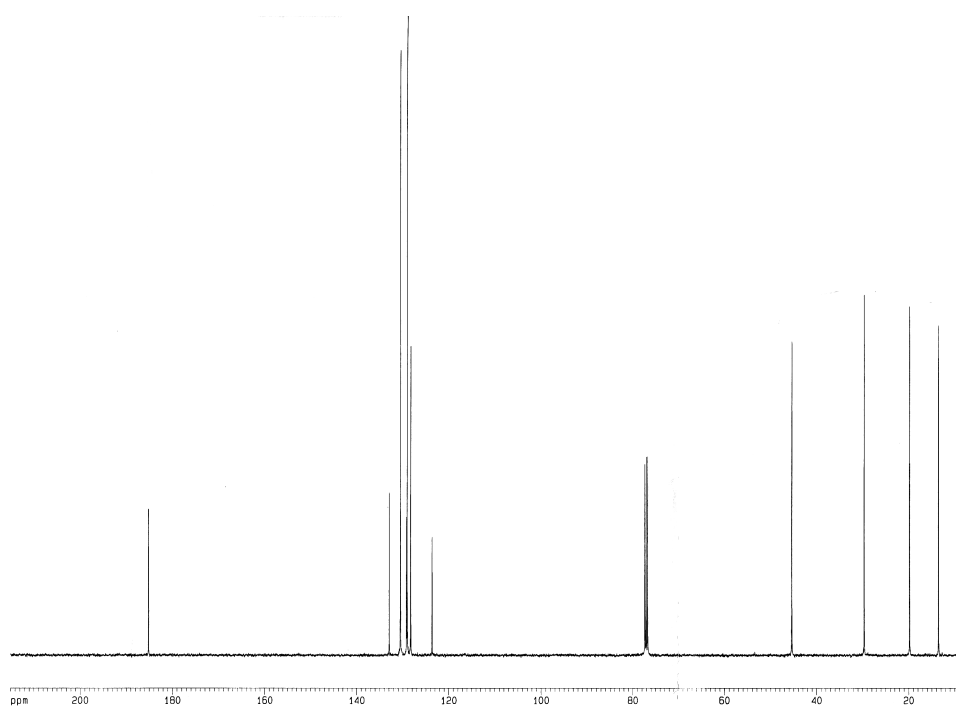

Figure 4  $^{13}\text{C}$  NMR Spectra of **4** in  $\text{CDCl}_3$

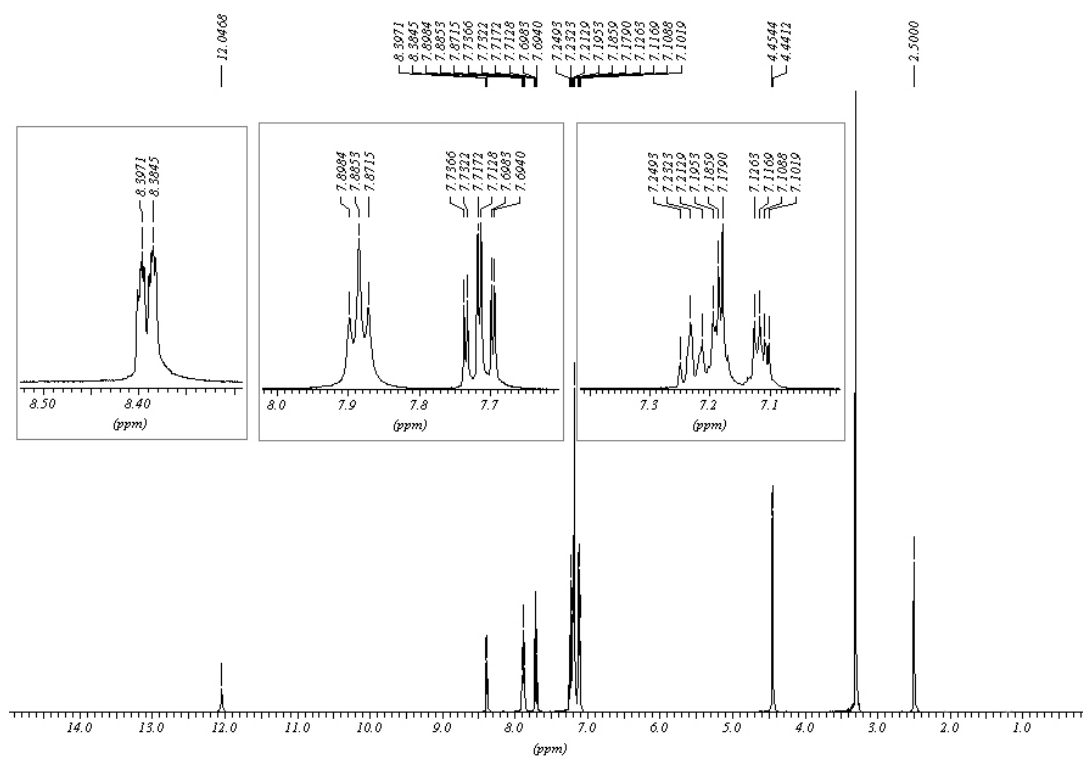

Figure 5  $^1\text{H}$  NMR Spectra of **5** in  $\text{DMSO-d}_6$

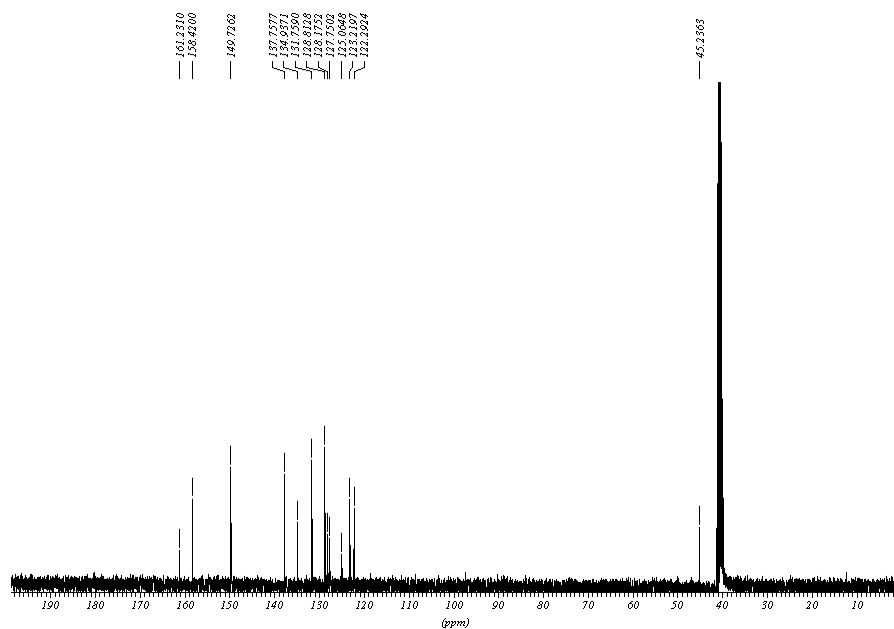

Figure 6  $^{13}\text{C}$  NMR Spectra of **5** in  $\text{DMSO-d}_6$

Electronic Supplementary Information for Dalton Transactions  
This journal is © The Royal Society of Chemistry 2008
